# Supplementary material for: Cytomegalovirus Exposure and the Risk of Overall Infection After Kidney Transplantation: A Cohort Study on the Indirect Effects Attributable to Viral Replication
Source: PubMed Central journal article supplement (PMC8842254; doi:10.3389/ti.2021.10273), 2022-01-20

## **Supporting information**

### **Supporting Methods**

#### *Description of immunosuppressive regimen*

All recipients of organs from donors after circulatory death underwent induction therapy with rabbit anti-thymocyte globulin (ATG-Fresenius, 1.25 mg/Kg daily for 5-7 days), with delayed introduction of a calcineurin inhibitor (CNI) from post-transplant day 6. Recipients at high immunological risk also received ATG induction for 1-3 days with early CNI initiation from post-transplant day 0. Basiliximab (20 mg on days 0 and 4) with delayed CNI introduction from post-transplant day 5 was reserved to patients at high risk for CNI-related nephrotoxicity (i.e., advanced age or pre-transplant comorbidities). Maintenance immunosuppression regimen consisted of tacrolimus (0.1 mg/Kg daily, adjusted to a target trough level of 10-15 ng/mL during the first month and 5-10 ng/mL thereafter); mycophenolic acid (360 mg twice daily); and prednisone (1 mg/Kg daily with progressive tapering). Conversion to mammalian target of rapamycin (mTOR) inhibitor-based regimens with reduced-dose tacrolimus (target trough level of 3-6 ng/mL) was performed on an individual basis for recipients experiencing severe CNI-related adverse effects, difficult-to-treat cytomegalovirus infection, or post-transplant malignancy.

## Supporting Results

**Table S1.** Description of episodes of non-CMV opportunistic infection (n = 41).

| Clinical syndrome                         | N (%)     |
|-------------------------------------------|-----------|
| Mucocutaneous HSV-1/2 infection           | 13 (31.7) |
| Herpes zoster (shingles)                  | 12 (29.3) |
| Probable invasive pulmonary aspergillosis | 4 (9.8)   |
| Mucosal and cutaneous candidiasis         | 3 (7.3)   |
| Proven mucormycosis                       | 2 (4.9)   |
| <i>Candida</i> esophagitis                | 2 (4.9)   |
| Cryptococcal meningitis                   | 1 (2.4)   |
| Invasive trichosporonosis                 | 1 (2.4)   |
| <i>Pneumocystis jiroveci</i> pneumonia    | 1 (2.4)   |
| Nocardiosis                               | 1 (2.4)   |
| Visceral leishmaniasis                    | 1 (2.4)   |

HSV: herpes simplex virus.

**Table S2.** Clinical variables not related to CMV exposure that achieved univariable *P*-values <0.08 and were entered as covariates in landmark Cox regression models<sup>a</sup>.

| <b><i>Non-CMV infection beyond day 30 after transplantation</i></b> |                                   |                                |                                 |                       |
|---------------------------------------------------------------------|-----------------------------------|--------------------------------|---------------------------------|-----------------------|
|                                                                     | <b>No infection<br/>(n = 159)</b> | <b>Infection<br/>(n = 122)</b> | <b>Univariable HR (95% CI)</b>  | <b><i>P</i>-value</b> |
| Age of recipient, years [mean ± SD]                                 | 52.5 ± 15.8                       | 57.0 ± 15.5                    | 1.02 (1.00 – 1.03) <sup>b</sup> | 0.011                 |
| Number of pre-transplant comorbidities [median (IQR)]               | 2 (1 – 3)                         | 2 (1 – 4)                      | 1.13 (1.00 – 1.27) <sup>b</sup> | 0.043                 |
| Pre-transplant cerebrovascular disease [n (%)]                      | 8 (5.1)                           | 16 (13.1)                      | 1.89 (1.12 – 3.19)              | 0.018                 |
| Age of the donor, years [men ± SD]                                  | 50.9 ± 16.2                       | 55.3 ± 16.6                    | 1.01 (1.00 – 1.02) <sup>b</sup> | 0.017                 |
| Living donor [n (%)]                                                | 23 (14.6)                         | 8 (6.6)                        | 0.47 (0.23 – 0.96)              | 0.039                 |
| Intraoperative blood product transfusion [n (%)]                    | 13 (8.2)                          | 19 (15.6)                      | 1.59 (0.98 – 2.59)              | 0.063                 |
| Delayed graft function [n (%)]                                      | 67 (42.1)                         | 66 (54.5)                      | 1.53 (1.07 – 2.19)              | 0.020                 |
| Reintervention within the first month [n (%)]                       | 11 (6.9)                          | 18 (14.8)                      | 2.03 (1.23 – 3.35)              | 0.006                 |
| Estimated GFR at month 1, mL/min/1.72 m <sup>2</sup> [mean ± SD]    | 44.0 ± 19.6                       | 36.1 ± 17.8                    | 0.98 (0.97 – 0.99) <sup>b</sup> | <0.001                |
| Non-CMV infection within the first month [n (%)]                    | 39 (24.5)                         | 52 (42.6)                      | 2.01 (1.40 – 2.88)              | <0.001                |
| <b><i>Non-CMV infection beyond day 90 after transplantation</i></b> |                                   |                                |                                 |                       |
|                                                                     | <b>No infection<br/>(n = 190)</b> | <b>Infection<br/>(n = 84)</b>  | <b>Univariable HR (95% CI)</b>  | <b><i>P</i>-value</b> |
| Number of HLA mismatches [median (IQR)]                             | 4 (3 – 5)                         | 5 (3.3 – 5)                    | 1.17 (0.99 – 1.38) <sup>b</sup> | 0.067                 |
| CMV serostatus D+/R- [n (%)]                                        | 16 (8.4)                          | 13 (15.5)                      | 1.72 (0.95 – 3.10)              | 0.074                 |
| Positive HCV serostatus [n (%)]                                     | 21 (11.4)                         | 3 (3.6)                        | 2.83 (0.89 – 8.96)              | 0.077                 |
| Reintervention within the first 3 months [n (%)]                    | 18 (9.5)                          | 15 (17.9)                      | 1.75 (1.00 – 3.07)              | 0.049                 |

|                                                                  |             |             |                                 |        |
|------------------------------------------------------------------|-------------|-------------|---------------------------------|--------|
| Estimated GFR at month 3, mL/min/1.72 m <sup>2</sup> [mean ± SD] | 45.6 ± 16.3 | 40.6 ± 17.9 | 0.98 (0.97 – 0.99) <sup>b</sup> | 0.009  |
| Non-CMV infection within the first 3 months [n (%)]              | 73 (38.4)   | 54 (64.3)   | 2.49 (1.59 – 3.89)              | <0.001 |
| Acute graft rejection within the first 3 months [n (%)]          | 9 (4.7)     | 8 (9.5)     | 1.98 (0.96 – 4.10)              | 0.066  |

**Non-CMV infection beyond day 180 after transplantation**

|                                                     | No infection<br>(n = 214) | Infection<br>(n = 52) | Univariable HR (95% CI)         | P-value |
|-----------------------------------------------------|---------------------------|-----------------------|---------------------------------|---------|
| Pre-transplant cerebrovascular disease [n (%)]      | 14 (6.4)                  | 10 (19.2)             | 2.82 (1.41 – 5.63)              | 0.003   |
| Number of HLA mismatches [median (IQR)]             | 4 (3 – 5)                 | 5 (3 – 6)             | 1.22 (0.98 – 1.52) <sup>b</sup> | 0.074   |
| CMV serostatus D+/R- [n (%)]                        | 20 (9.1)                  | 9 (17.3)              | 2.06 (1.00 – 4.22)              | 0.050   |
| Non-CMV infection within the first 6 months [n (%)] | 104 (47.5)                | 35 (67.3)             | 2.19 (1.23 – 3.91)              | 0.008   |

**Non-CMV infection beyond day 360 after transplantation**

|                                                      | No infection<br>(n = 232) | Infection<br>(n = 32) | Univariable HR (95% CI)         | P-value |
|------------------------------------------------------|---------------------------|-----------------------|---------------------------------|---------|
| Age of the donor, years [men ± SD]                   | 51.6 ± 16.5               | 57.6 ± 17.9           | 1.02 (0.99 – 1.04) <sup>b</sup> | 0.059   |
| Pre-transplant cerebrovascular disease [n (%)]       | 14 (6.1)                  | 8 (25.0)              | 4.20 (1.89 – 9.37)              | 0.0004  |
| Non-CMV infection within the first 12 months [n (%)] | 119 (51.3)                | 26 (81.2)             | 3.78 (1.56 – 9.19)              | 0.003   |

CI: confidence interval; CMV: cytomegalovirus; D: donor; HCV: hepatitis C virus; GFR: glomerular filtration rate; HLA: human leukocyte antigen; HR: hazard ratio; IQR: interquartile range; SD: standard deviation; R: recipient.

<sup>a</sup> Various groups of variables were initially tested at the univariable level: demographic and clinical features (i.e. comorbidities, causes of end-stage renal disease, previous transplantation), donor age and type (i.e. donation after brain or circulatory death, living donor), surgical and peri-operative variables (i.e. cold ischemia time, surgical complications, delayed graft function), laboratory results (i.e. graft function, leucocyte and lymphocyte count), immunosuppressive agents, occurrence of graft rejection, type of CMV prevention strategy used (antiviral prophylaxis or preemptive therapy), and the occurrence of non-CMV infection within the preceding period. Only those variables that achieved univariate *P*-values <0.08 were entered into the different Cox models, providing that the amount of collinearity was acceptable.

<sup>b</sup> HR per unitary increment.

**Table S3.** Multivariable Cox regression models for different landmark survival analyses analyzing the impact of the cumulative exposure to any level or high-level ( $\geq 1,000$  IU/mL) CMV viremia on the subsequent occurrence of overall non-CMV infection, both in the entire cohort and in the subgroup of patients that did not receive CMV antiviral prophylaxis.

| <i>Landmark survival analysis</i> |                            | Overall cohort (n = 291) |               |         | No antiviral prophylaxis (n = 125) |               |                      |
|-----------------------------------|----------------------------|--------------------------|---------------|---------|------------------------------------|---------------|----------------------|
|                                   |                            | aHR                      | 95% CI        | P-value | aHR                                | 95% CI        | P-value <sup>a</sup> |
| Beyond day 30                     | CMV infection at any level | 1.499                    | 0.839 – 2.679 | 0.267   | 1.163                              | 0.486 – 2.786 | 0.342                |
|                                   | High-level CMV viremia     | 1.045                    | 0.476 – 2.294 | 0.456   | 0.891                              | 0.331 – 2.398 | 0.456                |
| Beyond day 90                     | CMV infection at any level | 1.184                    | 0.732 – 1.915 | 0.567   | 2.542                              | 1.095 – 5.901 | <b>0.030</b>         |
|                                   | High-level CMV viremia     | 1.226                    | 0.705 – 2.132 | 0.898   | 2.371                              | 1.136 – 4.947 | <b>0.021</b>         |
| Beyond day 180                    | CMV infection at any level | 1.050                    | 0.574 – 1.923 | 0.345   | 2.588                              | 0.744 – 9.005 | 0.385                |
|                                   | High-level CMV viremia     | 1.434                    | 0.780 – 2.638 | 0.390   | 2.518                              | 0.931 – 6.812 | 0.256                |
| Beyond day 360                    | CMV infection at any level | 0.990                    | 0.443 – 2.212 | 0.401   | 1.895                              | 0.394 – 9.118 | 0.454                |
|                                   | High-level CMV viremia     | 1.468                    | 0.671 – 3.212 | 0.560   | 1.799                              | 0.486 – 6.660 | 0.348                |

aHR: adjusted hazard ratio; CI: confidence interval; CMV: cytomegalovirus.

<sup>a</sup> Bold characters denote significant associations.

**Figure S1.** Kaplan-Meier curves for the incidence of overall non-CMV infection (primary outcome) according to the cumulative exposure to high-level CMV viremia ( $\geq 1,000$  IU/mL) beyond day 30 (log-rank  $P$ -value = 0.094) **(a)**, day 90 (log-rank  $P$ -value = 0.086) **(b)**, day 180 (log-rank  $P$ -value = 0.208) **(c)**, and day 360 (log-rank  $P$ -value = 0.137) **(d)** after transplantation. CMV: cytomegalovirus.

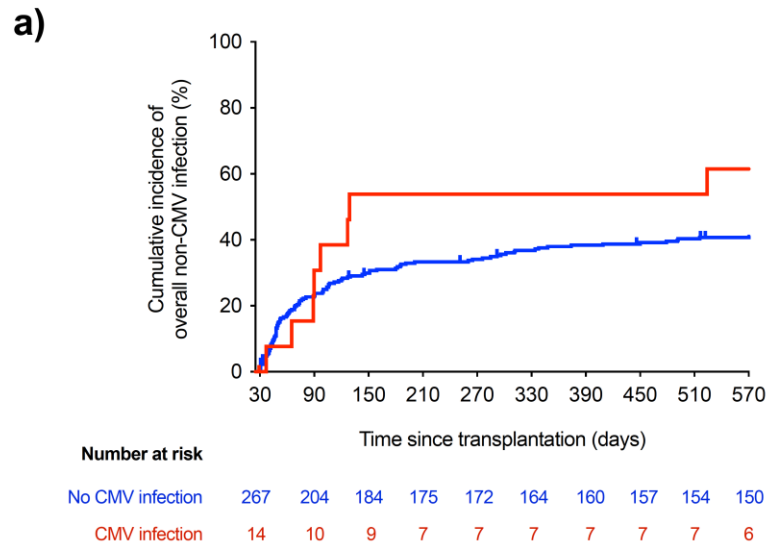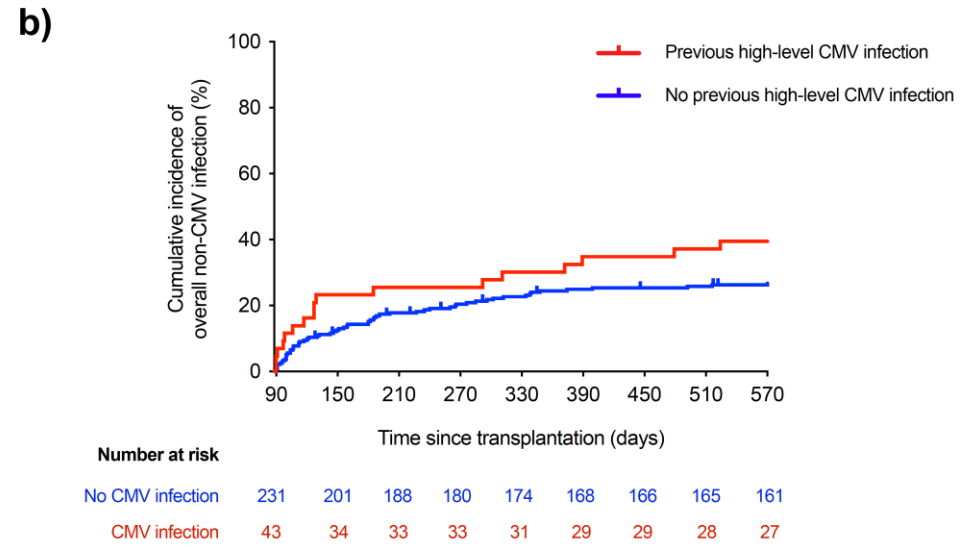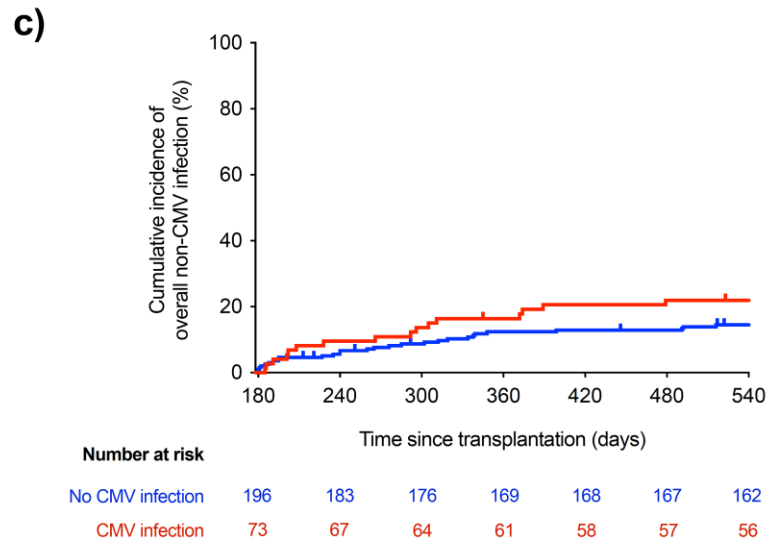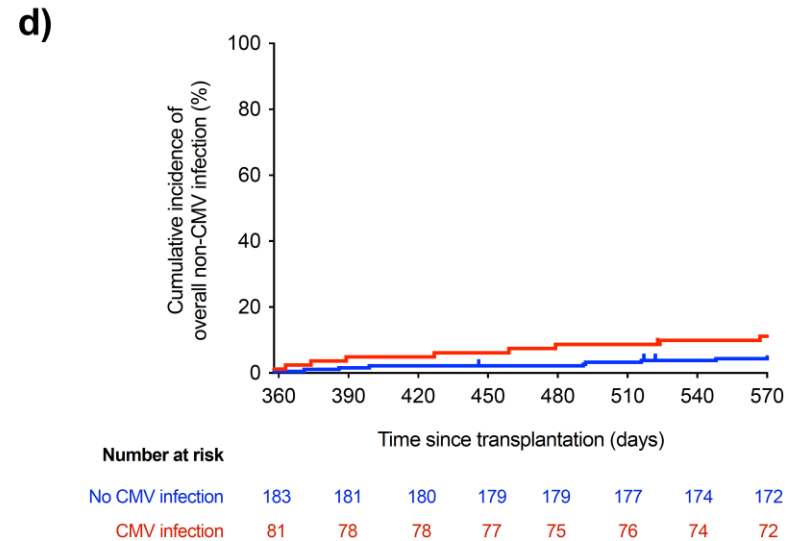

**Figure S2.** Kaplan-Meier curves for the incidence of overall non-CMV infection according to the recent exposure to CMV infection at any level during the preceding period beyond day 90 (log-rank  $P$ -value = 0.469) **(a)**, day 180 (log-rank  $P$ -value = 0.367) **(b)**, and day 360 (log-rank  $P$ -value = 0.221) **(c)** after transplantation.

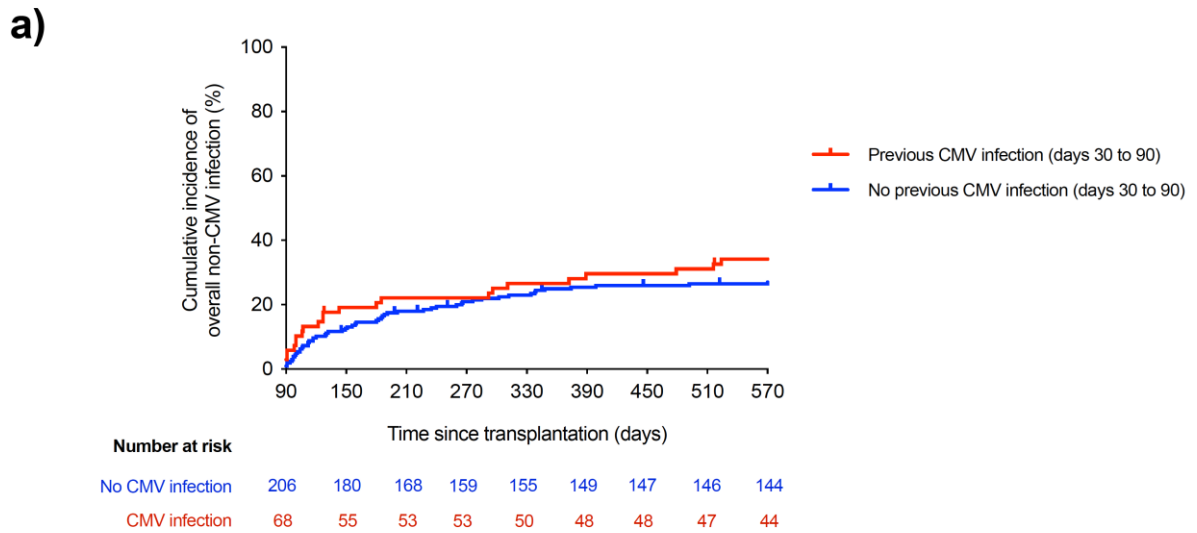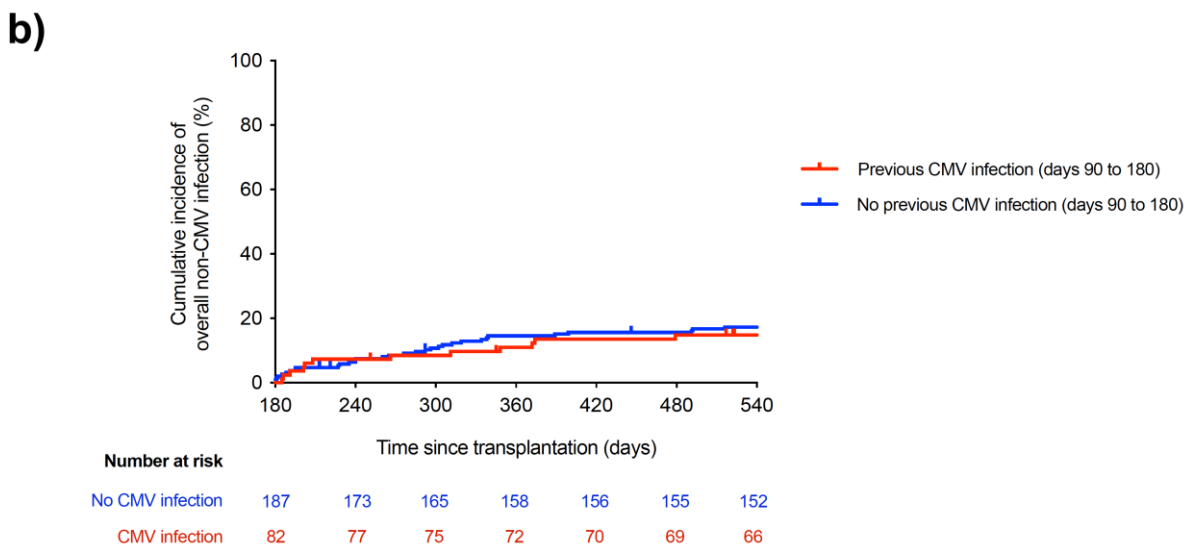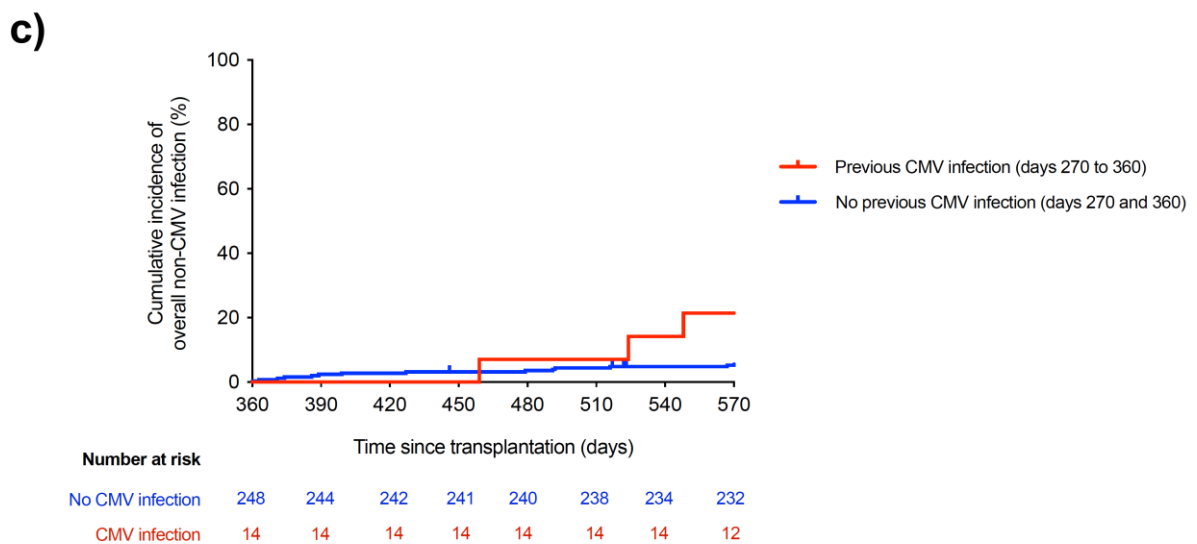

**Figure S3.** Adjusted hazard ratios (circles) with 95% confidence intervals (whiskers) in landmark Cox regression models for the occurrence of overall non-CMV infection according to the recent exposure to any level or high-level CMV ( $\geq 1,000$  IU/mL) infection during the preceding period: **(a)** entire study cohort; **(b)** patients not receiving CMV antiviral prophylaxis. Clinical covariates adjusted for are detailed in Table S1. The models beyond day 360 in the group with no antiviral prophylaxis could not be constructed due to the low number of patients. Significant associations are depicted in black. CMV: cytomegalovirus.

**a) Overall cohort**

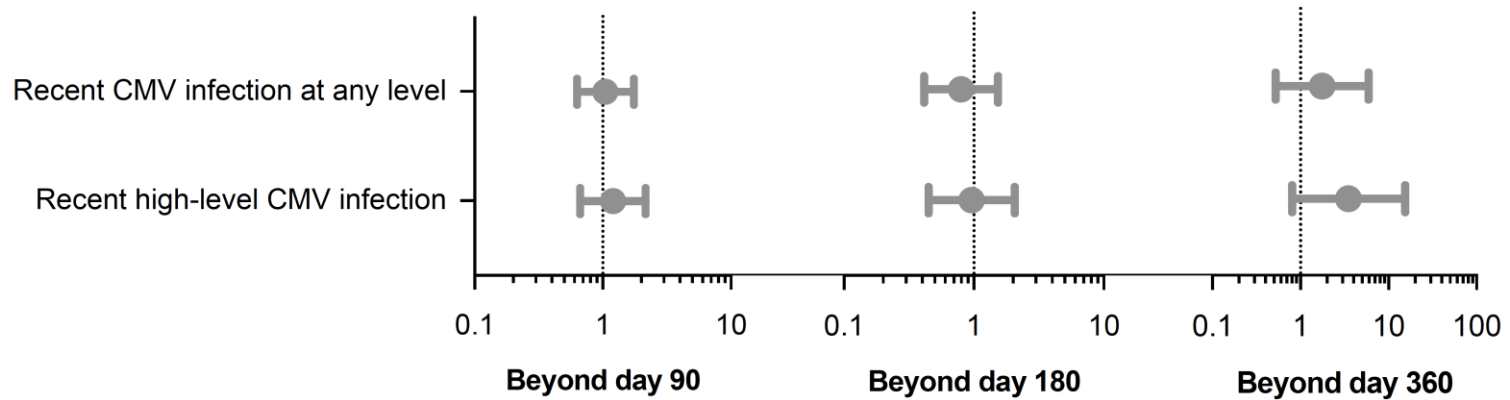

**b) No CMV antiviral prophylaxis**

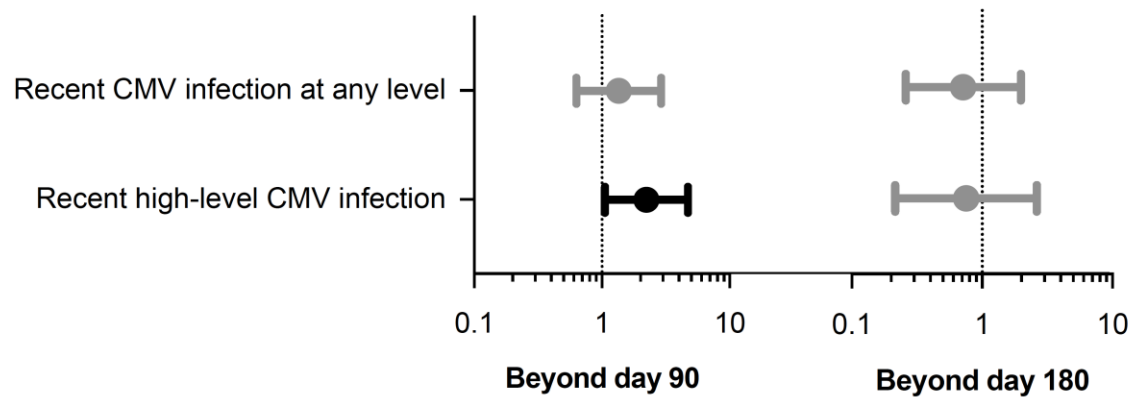



**Figure S4.** Kaplan-Meier curves for the incidence of bacterial infection (secondary outcome) according to the previous exposure to CMV infection at any level beyond day 30 (log-rank  $P$ -value = 0.344) **(a)**, day 90 (log-rank  $P$ -value = 0.679) **(b)**, day 180 (log-rank  $P$ -value = 0.359) **(c)**, and day 360 (log-rank  $P$ -value = 0.853) **(d)** after transplantation. CMV: cytomegalovirus.

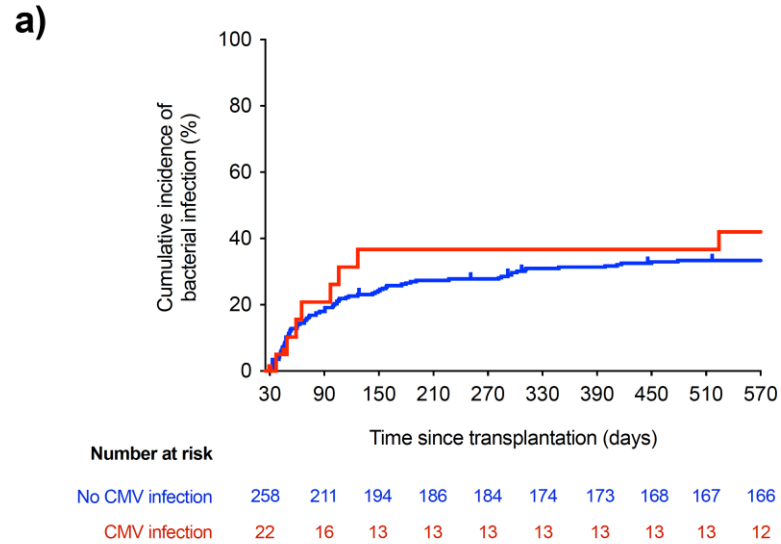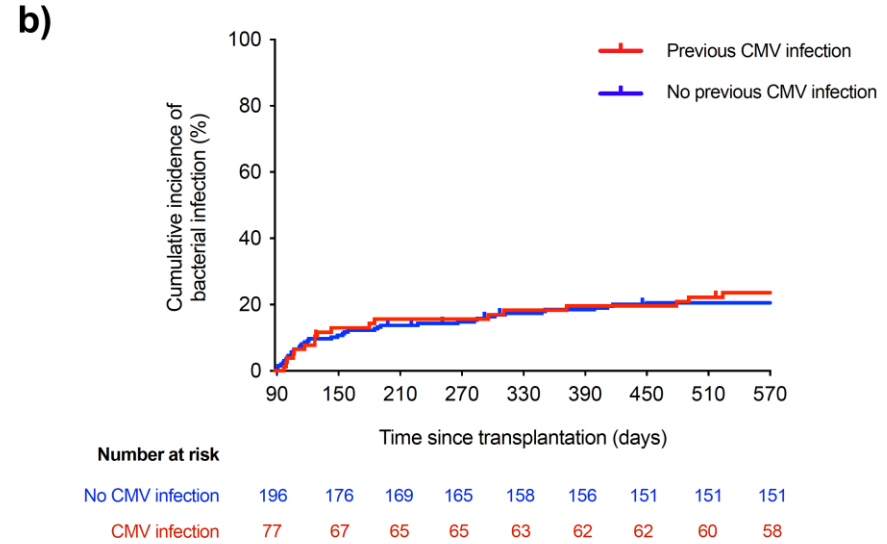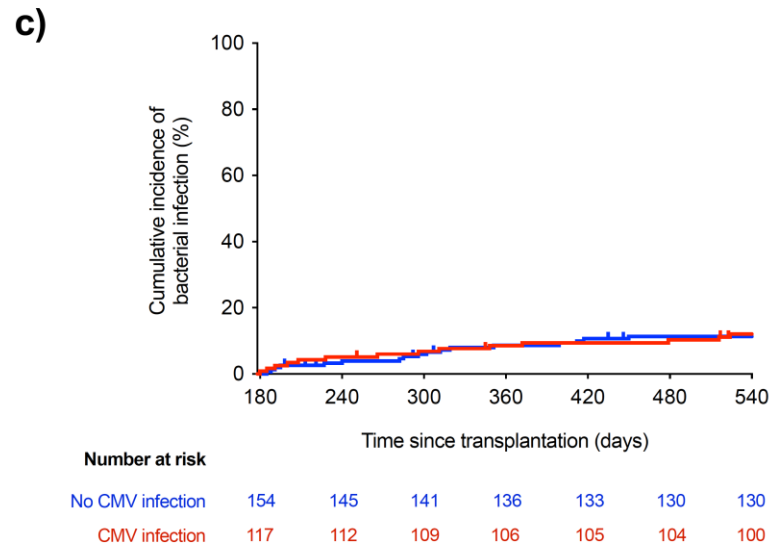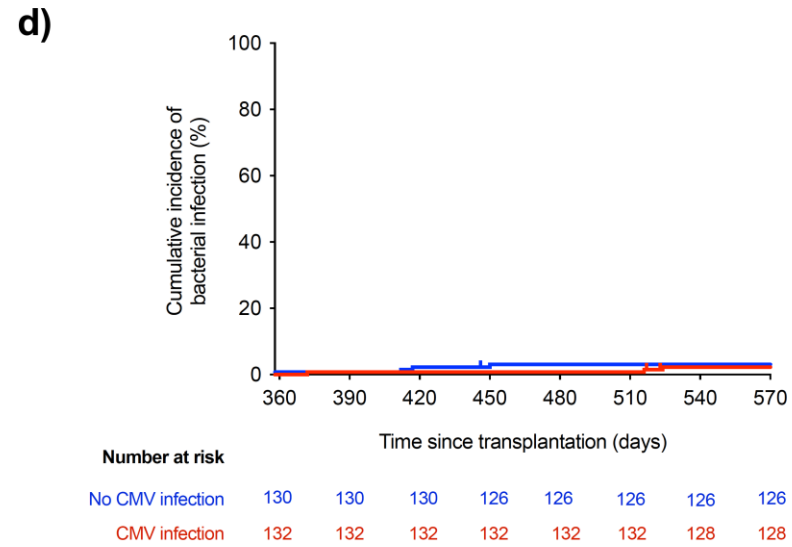

**Figure S5.** Kaplan-Meier curves for the incidence of opportunistic infection (secondary outcome) according to the previous exposure to CMV infection at any level beyond day 30 (log-rank  $P$ -value = 0.501) **(a)**, day 90 (log-rank  $P$ -value = 0.653) **(b)**, day 180 (log-rank  $P$ -value = 0.629) **(c)**, and day 360 (log-rank  $P$ -value = 0.497) **(d)** after transplantation. CMV: cytomegalovirus.

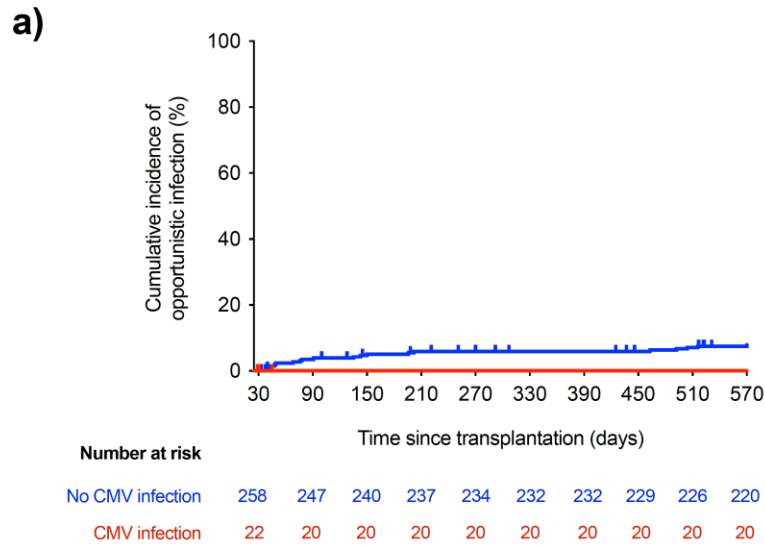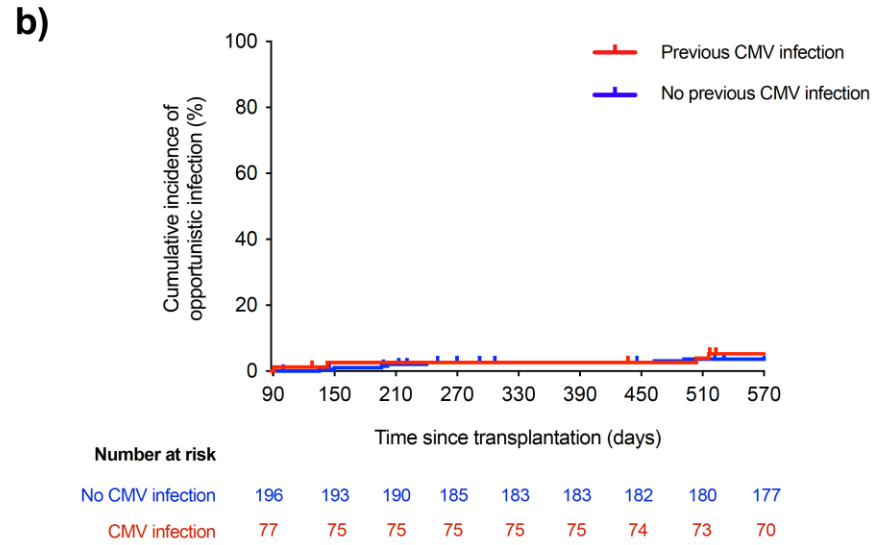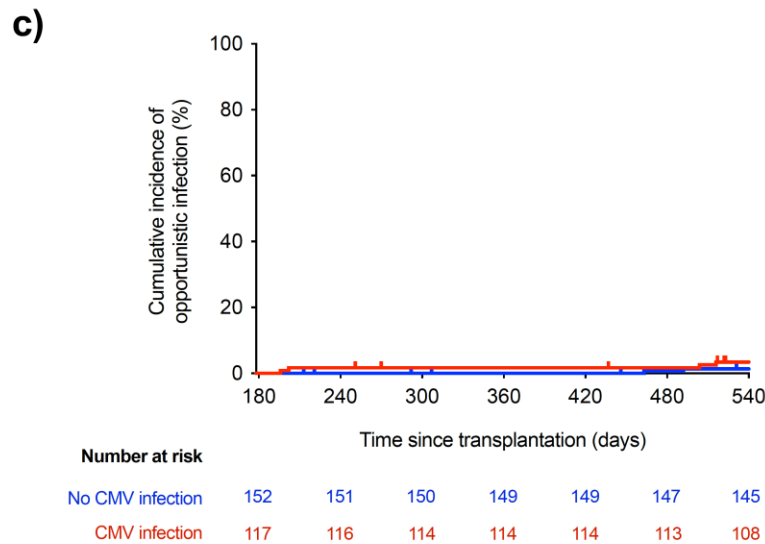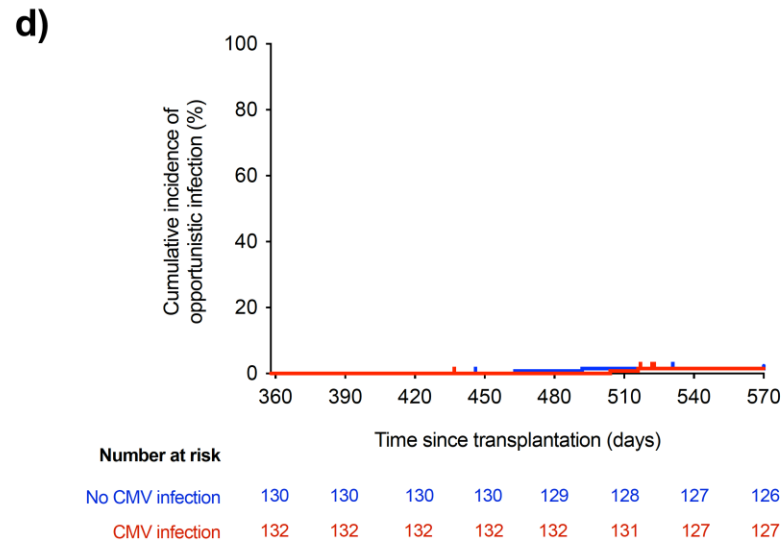

Supplement: DataSheet1.pdf [file DataSheet1.pdf]
